# Supplementary material
Source: PubMed Central journal article supplement (PMC5553962)
Supplement: supp_the2016-0462_onco12149-sup-0001-suppinfo01.pdf [file supp_the2016-0462_onco12149-sup-0001-suppinfo01.pdf]

Supplemental Figure for:  
Geriatric Assessment Predicts Survival and Competing Mortality in Elderly Patients with Early Colorectal Cancer--Can It Help in Adjuvant Therapy Decision-Making?

Maite Antonio et al.

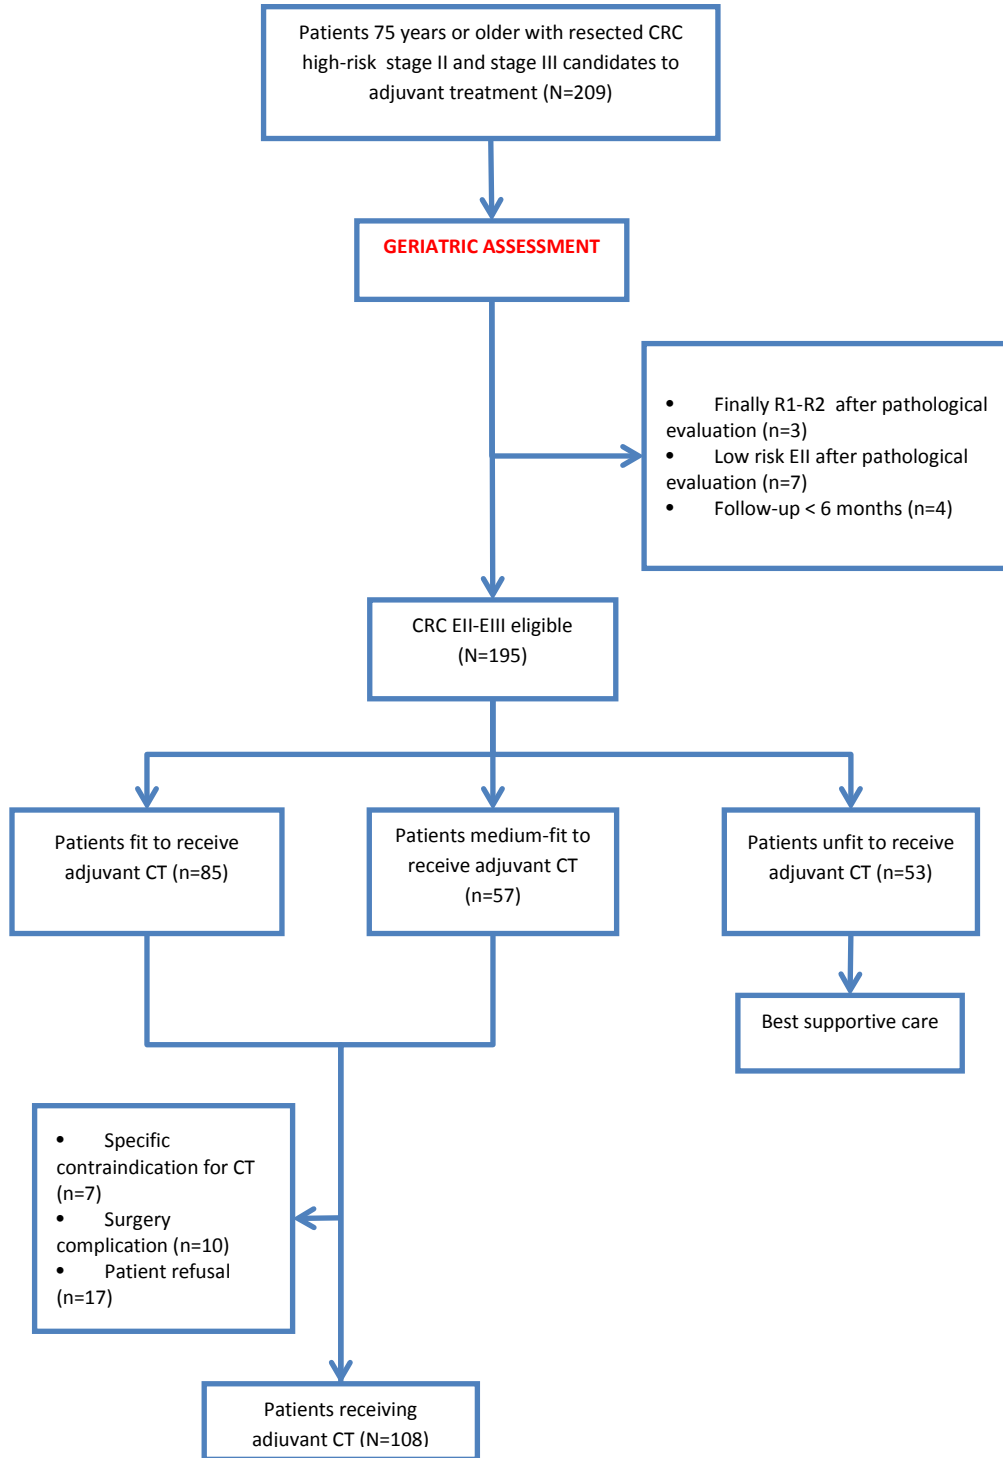

**Figure S1.** Flow chart of the study, patient population and sample finally included in the study. CCR, colorectal cancer; CT, chemotherapy
